# Supplementary material for: Precise determination of lithium isotope ratios at the sub-nanogram level by QQQ-ICP-MS: application to natural waters and carbonates
Source: Royal Society of Chemistry journal article supplement (doi:10.1039/d2ja00069e), 2022-01-01
Supplement: d2ja00069e1.pdf [file d2ja00069e1.pdf]

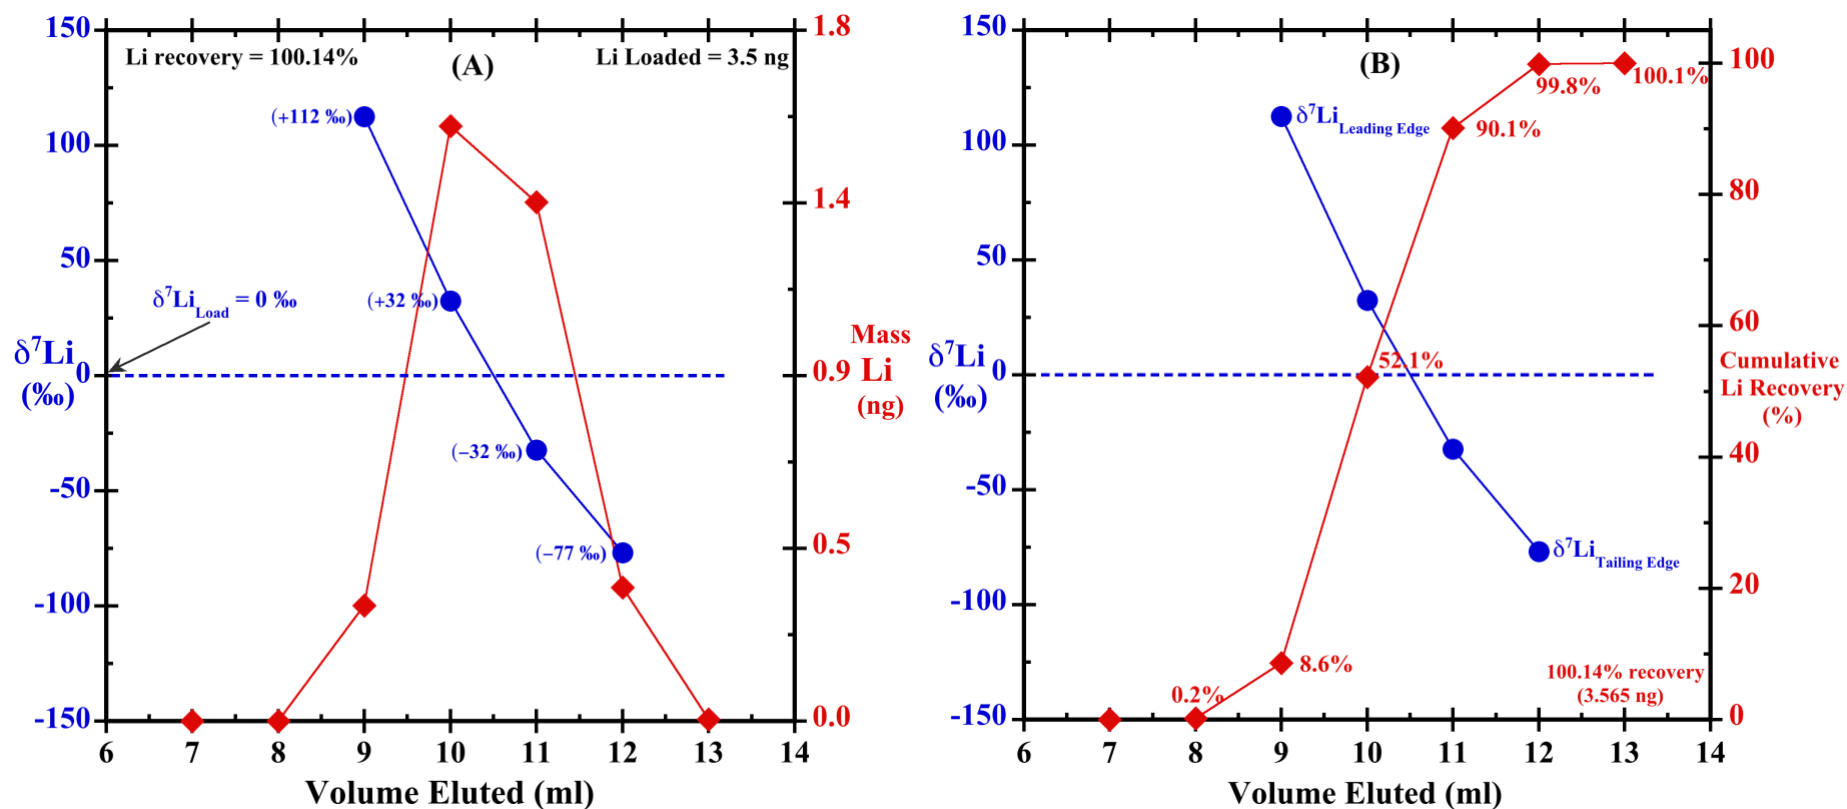

**Supplementary Fig. 1 (A & B):** Evolution of Li isotopic composition of during column elution. Lithium isotope ratio ( $\delta^7\text{Li}$ ) of column eluted fractions (solid blue circles) are plotted on the primary Y-axis in both panels A & B. In panel A, Li concentration of eluted fraction (open red diamonds) and in panel B, cumulative Li mass recovery (solid red diamonds) are plotted on the secondary Y-axis. The elution volumes (6 ml to 14 ml) are plotted on X-axis. The column was loaded with 3.5 ng of L-SVEC NIST 8545 ( $\delta^7\text{Li}_{\text{L-SVEC}} = 0$ ‰). The elution was done volumetrically and both the concentration and isotope ratio determination of Li was done on QQQ-ICP-MS

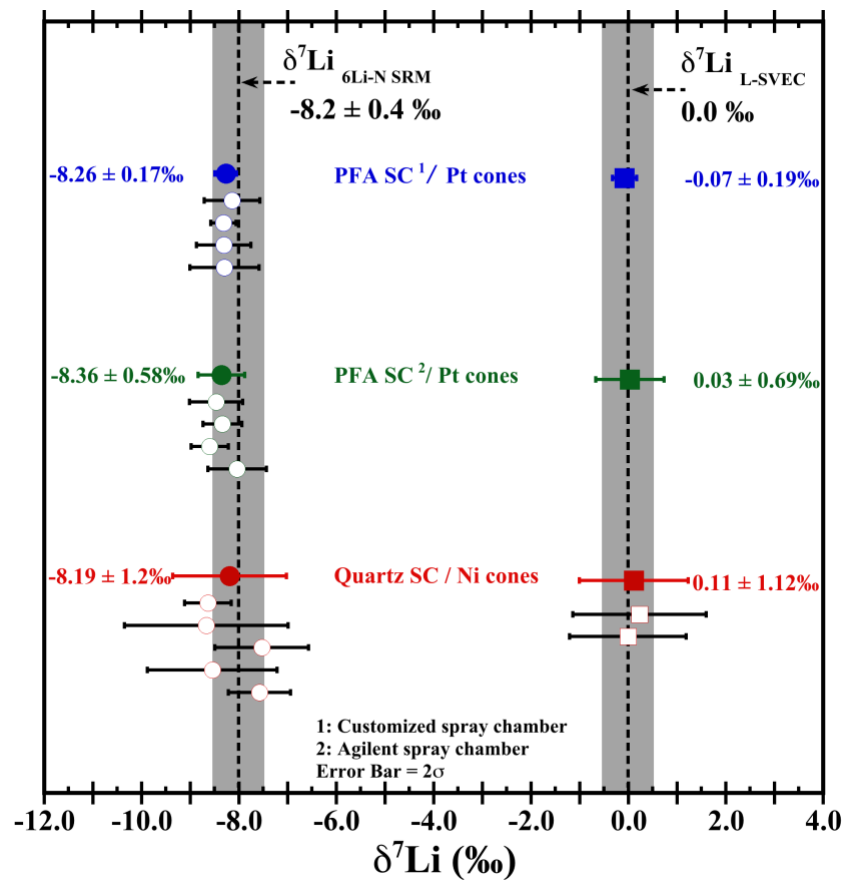

**Supplementary Fig. 2.** Comparison of accuracy and precision of  $\delta^7\text{Li}$  determination for different mass spectrometer front end settings. The  $\delta^7\text{Li}$  values are plotted on the primary X-axis. Two different standards, NIST-L-SVEC (squares) and Li-6 N SRM (circles), were analyzed following SSB protocol against concentration matched NIST L-SVEC for the comparison. The open symbols represent triplicate measurements during an instrument session. The average of individual sessions is represented by solid symbols. Error bars represent  $2\sigma$  analytical uncertainty. The gray area represents  $\pm 0.5\text{‰}$  window of analytical uncertainty.

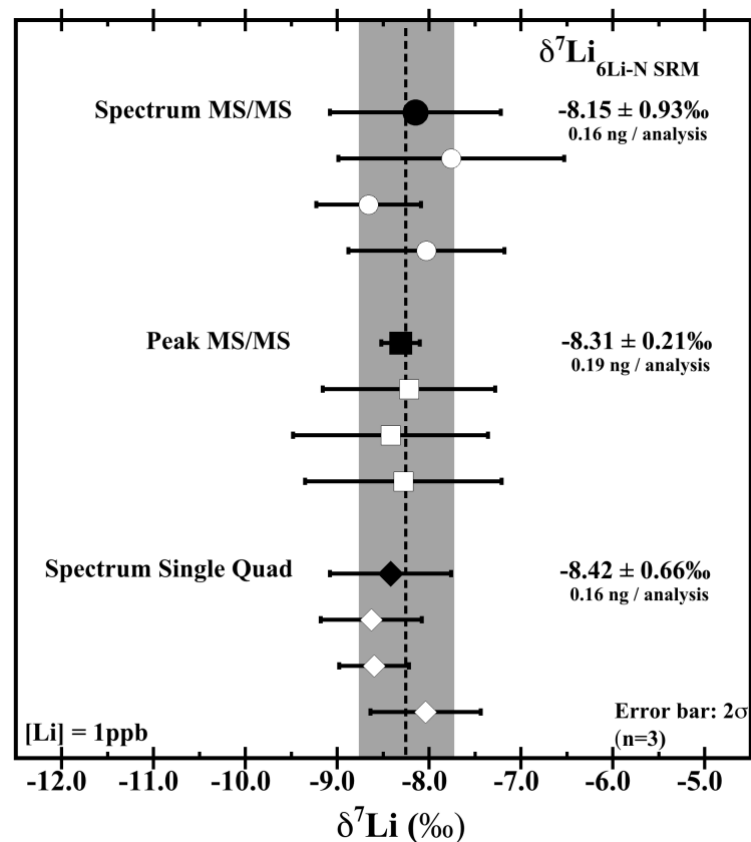

**Supplementary Fig. 3.** Comparison of accuracy and precision of different combination of scan modes utilized for  $\delta^7\text{Li}$  determination. The  $\delta^7\text{Li}$  values are plotted on primary X-axis. Open symbols represent triplicate individual analysis and the session averages are represented by solid symbols. The secondary standard  $6\text{Li}$  N-SRM (-8.2‰) at  $1 \text{ ng ml}^{-1}$  [Li] was analyzed against concentration matched NIST L-SVEC following SSB protocol for the comparison of scan modes. Three combinations of scan modes investigated are: (i) Spectrum MS/MS mode (circles), (ii) Peak MS/MS mode (squares); and (iii) Spectrum single Quad (diamonds). The vertical dashed line represents the accepted value of the standard  $6\text{Li}$ -N SRM (-8.2‰). Error bars represent  $2\sigma$  analytical uncertainty. The grey area represents  $\pm 0.5\%$  window of analytical uncertainty.

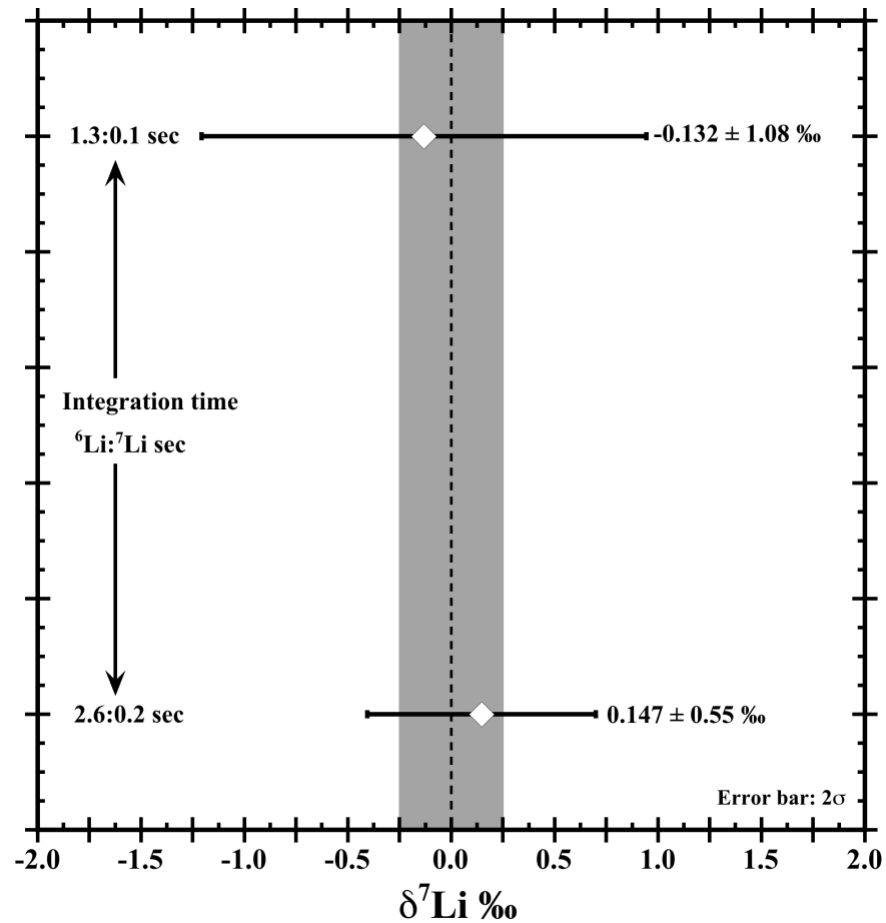

**Supplementary Fig. 4.** Comparison of precision and accuracy obtained from two different integration time setting for <sup>6</sup>Li and <sup>7</sup>Li. The  $\delta^7\text{Li}_{\text{L-SVEC}}$  values are plotted on primary X-axis. Open diamonds represents  $\delta^7\text{Li}$  values of L-SVEC measured in quintuplicate. Error bars represent 2 $\sigma$  analytical uncertainty. The gray area represents  $\pm 0.5\%$  window of analytical uncertainty.

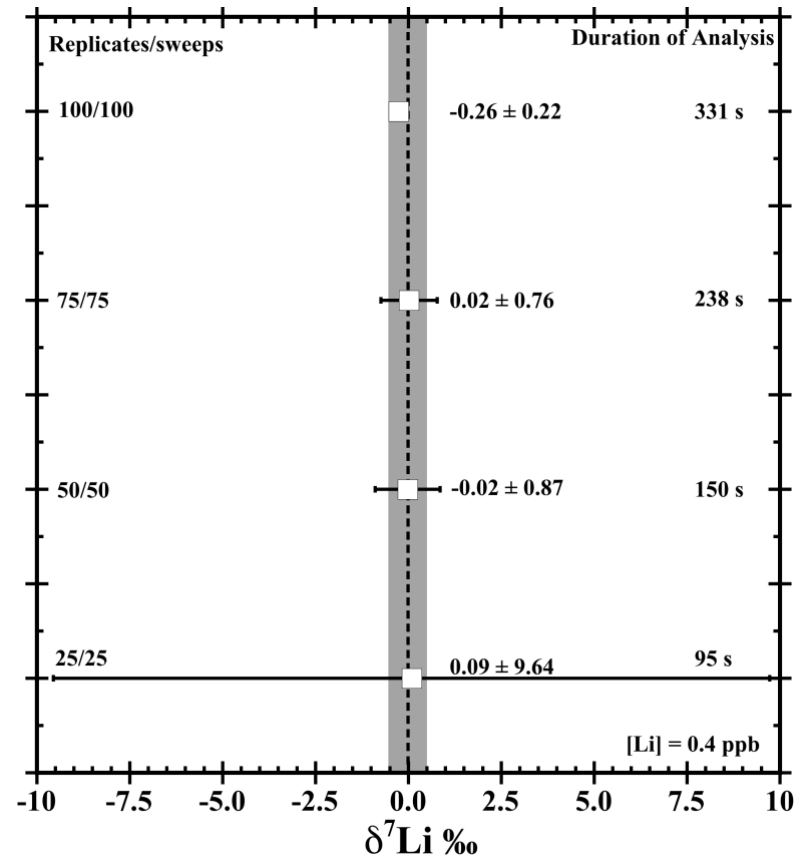

**Supplementary Fig 5.** Impact of choice of replicates and sweeps on the accuracy and precision of  $\delta^7\text{Li}$  determination. The  $\delta^7\text{Li}$  values are plotted on primary X-axis. The black open squares represent the average of quintuplicate  $\delta^7\text{Li}$  values of L-SVEC based on sextuplicate  $^7\text{Li}/^6\text{Li}$  ratio measurement. The  $\delta^7\text{Li}_{\text{L-SVEC}}$  values are provided next to open squares for respective replicate-sweeps. The vertical dashed line represents  $\delta^7\text{Li}_{\text{L-SVEC}}$  of 0‰. The time required per analysis is provided on the right side of the plot. Error bars represent  $2\sigma$  analytical uncertainty. The gray area represents  $\pm 0.5\%$  window of analytical uncertainty.

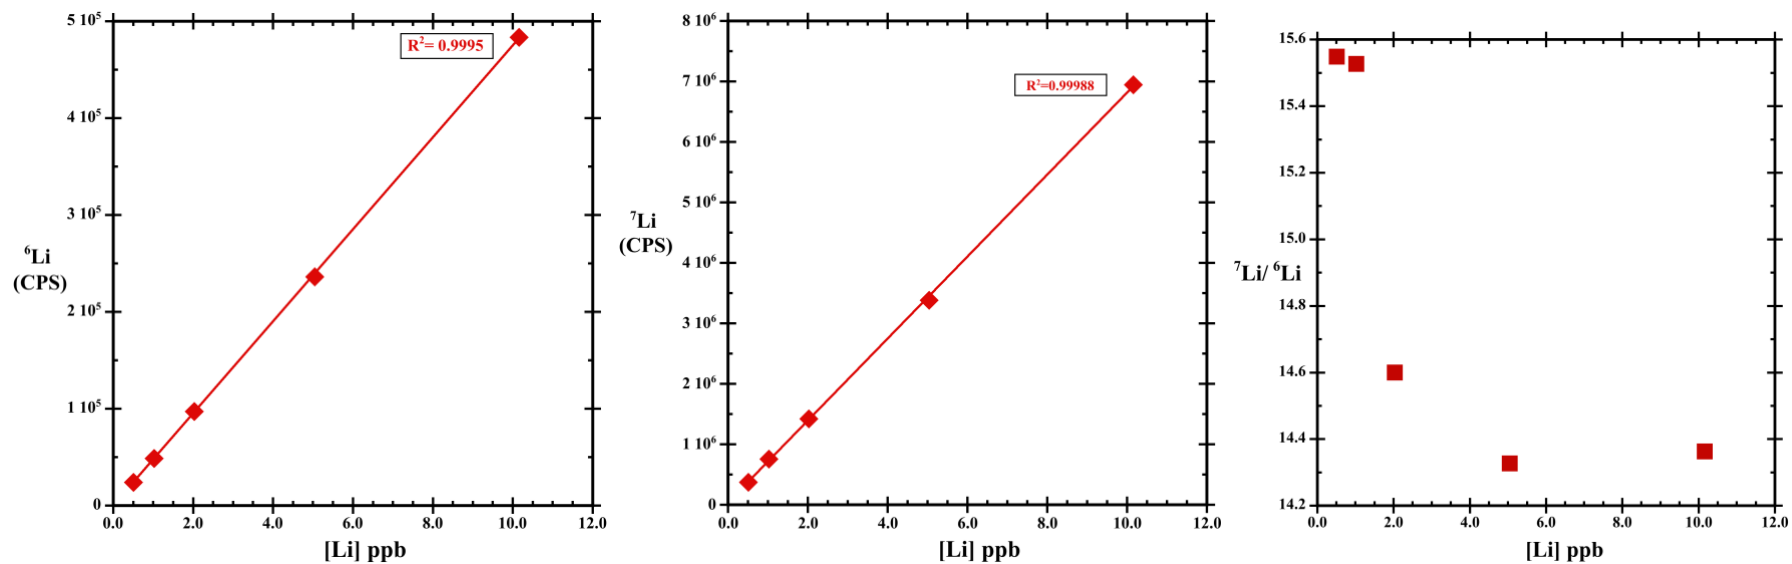

**(Supplementary) Fig. 6 (A & C):** Impact of ion detection mode on lithium sensitivity and mass bias ( ${}^7\text{Li}/{}^6\text{Li}$ ). Panels A and B represent  ${}^6\text{Li}$  and  ${}^7\text{Li}$  calibration with increasing [Li]. Panel C represents lithium mass bias with increasing [Li]. Under default instrumental settings, the switch over from pulse to analog counting happens at  $1.0 \times 10^6$  cps (observed threshold:  $0.7 \times 10^6$  cps). The  ${}^6\text{Li}$  calibration is exclusively in pulse mode; however, the  ${}^7\text{Li}$  calibration is in mixed mode. The switch over of  ${}^7\text{Li}$  detection from pulse to analog mode at ion counts  $>0.7 \times 10^6$  cps is reflected in the decrease in mass bias in Panel-C.

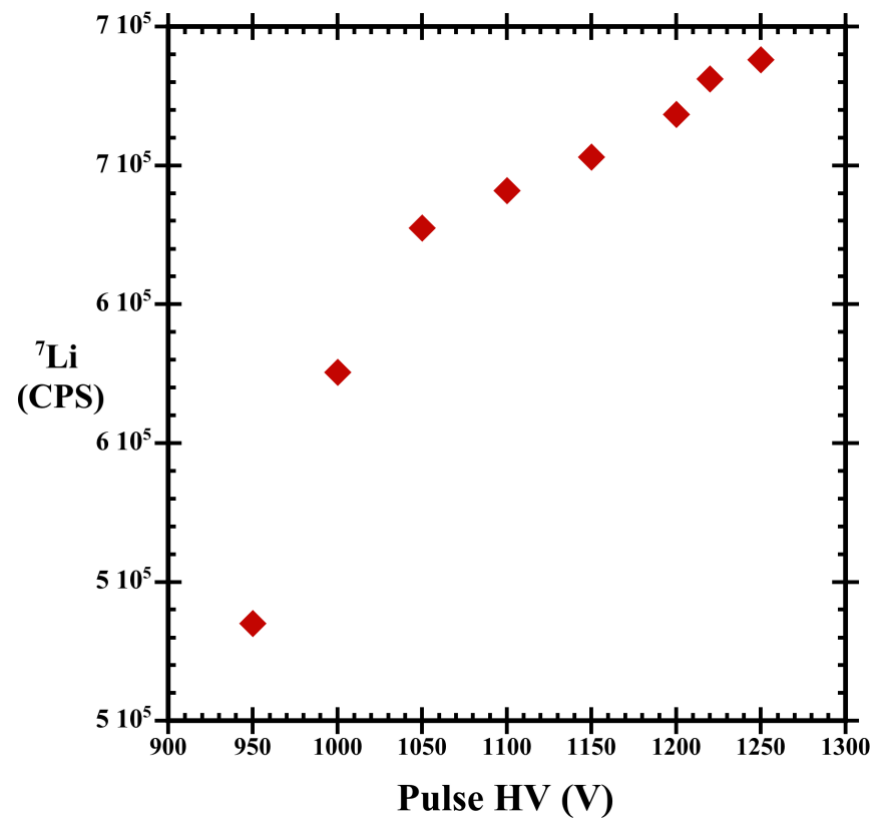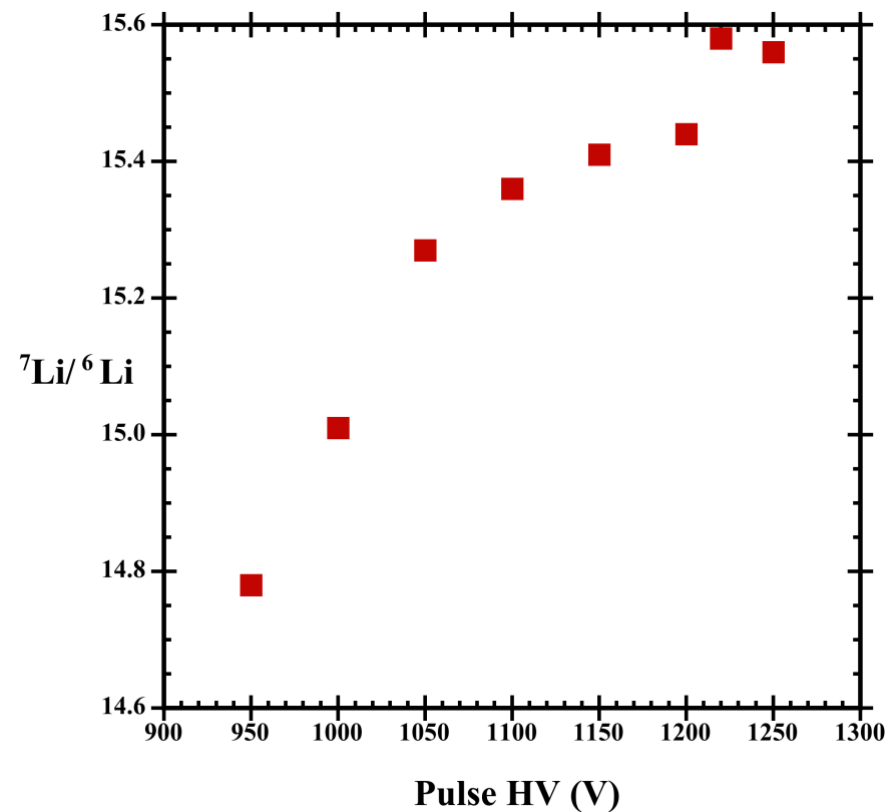

**(Supplementary) Fig. 7.** Response of Li sensitivity and mass bias to changes in detector Pulse HV. on within an analytical session. Pulse HV is plotted on X-axis. Lithium sensitivity (solid red diamonds) and mass bias (solid red squares) ( ${}^7\text{Li}/{}^6\text{Li}$ ) are plotted on Y-axis on panels A and B respectively.

**Supplementary table 1: Distribution coefficients at varying acid strengths for AG MP-50 resin**

| <b>Elements</b>  | <b>0.2N HCl</b> | <b>0.5N HCl</b> | <b>0.7N HCl</b> | <b>1.0N HCl</b> | <b>1.5N HCl</b> | <b>2.0N HCl</b> |
|------------------|-----------------|-----------------|-----------------|-----------------|-----------------|-----------------|
| Li               | 22.3            | 9.8             | 7.0             | 5.1             | 4.2             | 3.3             |
| Na               | 64              | 26              | 18.3            | 13.6            | 11.0            | 8.4             |
| Mg               | 469             | 89              | 44.0            | 24.8            | 16.0            | 7.2             |
| Ca               | 3700            | 850             | 604.0           | 214             | 135.5           | 57              |
| Mn               |                 | 161             | 87.9            | 43.6            | 27.5            | 11.3            |
| Fe III           | 6600            | 800             | 568.5           | 89              | 49.5            | 10              |
| Fe II            |                 | 113             | 60.7            | 30              | 18.5            | 6.9             |
| Sr               | 5700            | 1320            | 938.0           | 320             | 201.5           | 83              |
| $\alpha_{Na-Li}$ | 2.87            | 2.65            | 2.61            | 2.67            |                 |                 |
| $\alpha_{Mg-Na}$ |                 |                 |                 | 1.82            | 1.45            | 0.86            |

\* values from Strelow et al., 1984<sup>46</sup>



**Supplementary Table 2: Detailed Comparison of previously published column chromatography methods to the present method**

| Author                           | No. of steps   | Resin type | Resin volume/<br>Resin height                                  | Elution matrix                           | Total Elution volume<br>(Li fraction) | Total Elution volume<br>(Mg fraction) | Li Yield      | Blank/load             | Blank %<br>wrt Li<br>loaded |
|----------------------------------|----------------|------------|----------------------------------------------------------------|------------------------------------------|---------------------------------------|---------------------------------------|---------------|------------------------|-----------------------------|
| You and Chan <sup>26</sup>       | 1 step         | AG 50W-X8  | 11.78 ml/150 mm                                                | 0.5 mol L <sup>-1</sup> HCl              | 80 ml (42-62 ml)                      | -                                     | >98%          | 190 pg/100 ng-Li       | 0.19%                       |
| James and Palmer <sup>27</sup>   | 1 step         | AG 50W-X8  | 2.7 ml/85 mm                                                   | 0.2 mol L <sup>-1</sup> HCl              | 18 ml (24-42 ml)                      | -                                     | 100%          | 150 pg/100 ng-Li       | 0.15%                       |
| Hall et al. <sup>28</sup>        | 1 step         | AG 50W-X8  | 11.78 ml/150 mm                                                | 0.5 mol L <sup>-1</sup> HCl              | 30 ml                                 | -                                     | 100%          | 57±13 pg/100 ng-Li     | 0.07%                       |
| Hathorne and James <sup>29</sup> | 1 step         | AG 50W-X8  | 4.3 ml/85 mm                                                   | 0.2 mol L <sup>-1</sup> HCl              | 45 ml (24-42 ml)                      | -                                     | 100%          | 12 pg/4 ng-Li          | 0.30%                       |
| Misra and Froelich <sup>30</sup> | 1 step         | AG 50W-X8  | 2.0 ml/250 mm                                                  | 0.5 mol L <sup>-1</sup> HCl              | 11 ml (6-11 ml)                       | -                                     | 100.02–99.98% | 1.0 ± 0.5 pg/0.5 ng-Li | 0.20%                       |
| Van Hoecke et al. <sup>54</sup>  | 1 step         | AG 50W-X8  | 2.0, 3.0, 8.0 ml                                               | 0.5 mol L <sup>-1</sup> HCl              | 13 ml (5-13 ml)                       | -                                     | 97-102%       | -                      | -                           |
| Bohlin et al. <sup>31</sup>      | 1 step         | AG MP-50   | 3.0 ml/250 mm                                                  | 0.5 mol L <sup>-1</sup> HCl              | 22 ml (9-22 ml)                       | 57 ml (44-55 ml)                      | -             | -                      | -                           |
| Liu et al. <sup>41</sup>         | 2 step         | AG 50W-X8  | 1 <sup>st</sup> step - 17 ml; 2 <sup>nd</sup><br>step - 3.4 ml | 0.7 mol L <sup>-1</sup> HNO <sub>3</sub> | 85 ml (35-80 ml)                      | -                                     | 100%          | 5 pg/2.5 ng-Li         | 0.5%                        |
| Zhu <sup>25</sup>                | 1 step, 2 step | AG MP-50   | 1 ml/85 mm                                                     | 0.73 mol L <sup>-1</sup> HCl             | 17.5 ml                               | -                                     | >99%          | -                      | -                           |
| This study                       | 1 step         | AG MP-50   | 1.5 ml/200 mm                                                  | 0.5 mol L <sup>-1</sup> HCl              | 13 ml (7-12 ml)                       | 43 ml (37-43 ml)                      | 101.0±1.2 %   | 30-100 fg/ng-Li        | 0.05-0.1%                   |

**Supplementary table 3: long term 6Li-N SRM data**

| Long term SRM#6 (6Li-N SRM) Data |           |                   |             |             |                    |                   |              |              |          |                                  |              |              |
|----------------------------------|-----------|-------------------|-------------|-------------|--------------------|-------------------|--------------|--------------|----------|----------------------------------|--------------|--------------|
| Date                             |           | d <sup>7</sup> Li | 2S          | 2SE         | [Li]               | d <sup>7</sup> Li | 2S           | 2SE          | n        | d <sup>7</sup> Li <sub>avg</sub> | 2S           | 2SE          |
| 26/07/21                         | <b>1</b>  | <b>-8.07</b>      | <b>1.38</b> | <b>0.97</b> | <b>1.5-2 ng/ml</b> | <b>-8.240</b>     | <b>0.327</b> | <b>0.123</b> | <b>7</b> | <b>-8.269</b>                    | <b>0.290</b> | <b>0.075</b> |
| 27/07/21                         | <b>2</b>  | <b>-8.47</b>      | <b>1.34</b> | <b>0.77</b> | <b>1.5-2 ng/ml</b> |                   |              |              |          |                                  |              |              |
| 28/07/21                         | <b>3</b>  | <b>-8.28</b>      | <b>1.30</b> | <b>0.75</b> | <b>1.5-2 ng/ml</b> |                   |              |              |          |                                  |              |              |
| 28/07/21                         | <b>4</b>  | <b>-8.00</b>      | <b>0.46</b> | <b>0.32</b> | <b>1.5-2 ng/ml</b> |                   |              |              |          |                                  |              |              |
| 30/07/21                         | <b>5</b>  | <b>-8.30</b>      | <b>0.41</b> | <b>0.09</b> | <b>1.5-2 ng/ml</b> |                   |              |              |          |                                  |              |              |
| 10/08/21                         | <b>6</b>  | <b>-8.37</b>      | <b>0.59</b> | <b>0.34</b> | <b>1.5-2 ng/ml</b> |                   |              |              |          |                                  |              |              |
| 10/08/21                         | <b>7</b>  | <b>-8.20</b>      | <b>0.20</b> | <b>0.12</b> | <b>1.5-2 ng/ml</b> |                   |              |              |          |                                  |              |              |
| 19/09/21                         | <b>8</b>  | <b>-8.24</b>      | <b>0.83</b> | <b>0.48</b> | <b>1-1.5 ng/ml</b> | <b>-8.266</b>     | <b>0.203</b> | <b>0.102</b> | <b>4</b> |                                  |              |              |
| 22/09/21                         | <b>9</b>  | <b>-8.40</b>      | <b>1.45</b> | <b>0.84</b> | <b>1-1.5 ng/ml</b> |                   |              |              |          |                                  |              |              |
| 23/09/21                         | <b>10</b> | <b>-8.15</b>      | <b>0.95</b> | <b>0.43</b> | <b>1-1.5 ng/ml</b> |                   |              |              |          |                                  |              |              |
| 05/10/21                         | <b>11</b> | <b>-8.27</b>      | <b>1.10</b> | <b>0.55</b> | <b>1-1.5 ng/ml</b> |                   |              |              |          |                                  |              |              |
| 01/01/22                         | <b>12</b> | <b>-8.28</b>      | <b>0.66</b> | <b>0.66</b> | <b>0.4-1 ng/ml</b> | <b>-8.322</b>     | <b>0.341</b> | <b>0.170</b> | <b>4</b> |                                  |              |              |
| 02/01/22                         | <b>13</b> | <b>-8.10</b>      | <b>0.42</b> | <b>0.24</b> | <b>0.4-1 ng/ml</b> |                   |              |              |          |                                  |              |              |
| 10/02/22                         | <b>14</b> | <b>-8.45</b>      | <b>0.61</b> | <b>0.35</b> | <b>0.4-1 ng/ml</b> |                   |              |              |          |                                  |              |              |
| 11/02/22                         | <b>15</b> | <b>-8.45</b>      | <b>0.77</b> | <b>0.45</b> | <b>0.4-1 ng/ml</b> |                   |              |              |          |                                  |              |              |

**Supplementary table 4: Reported  $\delta^7\text{Li}$  seawater values**

| <b>Author</b>                      | <b><math>\delta^7\text{Li}</math> Seawater</b> | <b>Instrument</b> |
|------------------------------------|------------------------------------------------|-------------------|
| You and Chan <sup>26</sup>         | $32.4 \pm 2.6 \text{ ‰}$ (2S, n=6)             | TIMS              |
| Chan and Edmond <sup>6</sup>       | $33.3 \pm 1.2 \text{ ‰}$ (2S, n=5)             | TIMS              |
| Moriguti and Nakamura <sup>8</sup> | $30.0 \pm 0.7 \text{ ‰}$ (2S, n=5)             | TIMS              |
| James and Palmer <sup>27</sup>     | $32.5 \pm 1.6 \text{ ‰}$ (2S, n=7)             | TIMS              |
| Hall et al. <sup>28</sup>          | $33.0 \pm 1.2 \text{ ‰}$ (2S, n=7)             | TIMS              |
| Tomascak et al. <sup>36</sup>      | $31.8 \pm 1.9 \text{ ‰}$ (2S, n=15)            | MC-ICP-MS         |
| Nishio and Nakai <sup>52</sup>     | $29.3 \pm 0.9 \text{ ‰}$ (2S, n=3)             | MC-ICP-MS         |
| Bryant et al. <sup>37</sup>        | $31.0 \pm 1.8 \text{ ‰}$ (2S, n=18)            | MC-ICP-MS         |
| Jeffcoate et al. <sup>38</sup>     | $31.14 \pm 0.2 \text{ ‰}$ (2S, n=32)           | MC-ICP-MS         |
| Hathorne and James <sup>29</sup>   | $31.0 \pm 0.5 \text{ ‰}$ (2S, n=6)             | MC-ICP-MS         |
| Misra and Froelich <sup>30</sup>   | $30.75 \pm 0.45 \text{ ‰}$ (2S, n=10)          | Q-ICP-MS          |
| Toki et al. <sup>53</sup>          | $30.9 \pm 0.3 \text{ ‰}$ (2S, n=7)             | MC-ICP-MS         |
| Bohlin et al. <sup>31</sup>        | $30.27 \pm 0.40 \text{ ‰}$ (2S, n=30)          | MC-ICP-MS         |
| Liu et al. <sup>41</sup>           | $30.42 \pm 0.97 \text{ ‰}$ (2S, n=3)           | Q-ICP-MS          |
| Zhu et al. <sup>25</sup>           | $31.62 \pm 0.22 \text{ ‰}$ (2S, n=4)           | MC-ICP-MS         |
| This study                         | $31.34 \pm 0.56 \text{ ‰}$ (2S, n=49)          | QQQ-ICP-MS        |
